# Supplementary material for: One-step synthesis of a robust and anti-oil-fouling biomimetic cactus-like hierarchical architecture for highly efficient oil/water separation
Source: Royal Society of Chemistry journal article supplement (doi:10.1039/c9en01140d), 2020-01-01
Supplement: c9en01140d5.pdf [file c9en01140d5.pdf]

## Supporting Information

### **One-step synthesis of robust and anti-oil-fouling biomimetic cactus-like hierarchical architecture for highly efficient oil/water separation**

Lei Zhu<sup>a</sup>, Hui Li<sup>a</sup>, Yingying Yin<sup>a</sup>, Zhaozhen Cui,<sup>a</sup> Chao Ma<sup>b</sup>, Xiaofang Li<sup>\*a</sup>, Qingzhong Xue<sup>\*a</sup>

*<sup>a</sup>State Key Laboratory of Heavy Oil Processing, School of Materials Science and Engineering, China University of Petroleum, Qingdao 266580, Shandong, P. R. China*

*<sup>b</sup>College of Science, China University of Petroleum, Qingdao 266580, Shandong, P. R. China*

Corresponding author:

E-mail:lixfl9901314@163.com

Tel: 15589814081

E-mail: xueqingzhong@tsinghua.org.cn (Prof. Q. Z. Xue).

Tel: 86-0532-86981169; Fax: 86-0532-86981169

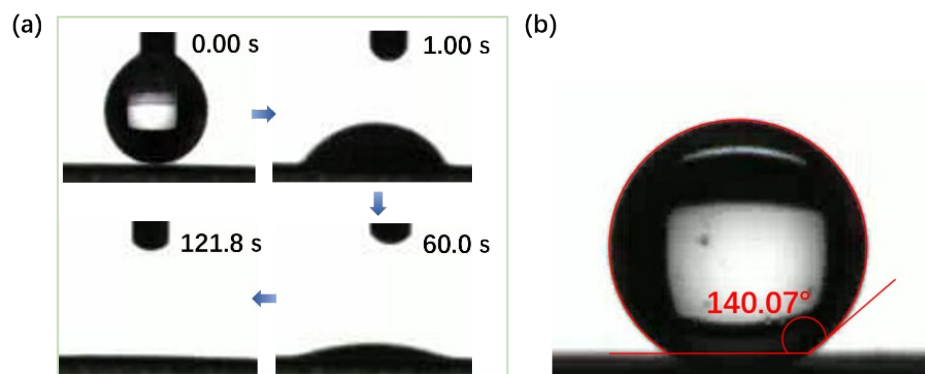

**Fig. S1** (a) A 5  $\mu\text{L}$  water droplet spreading on the pristine SSM with 121.8 s; (b) photograph of the UOCA for the pristine SSM.

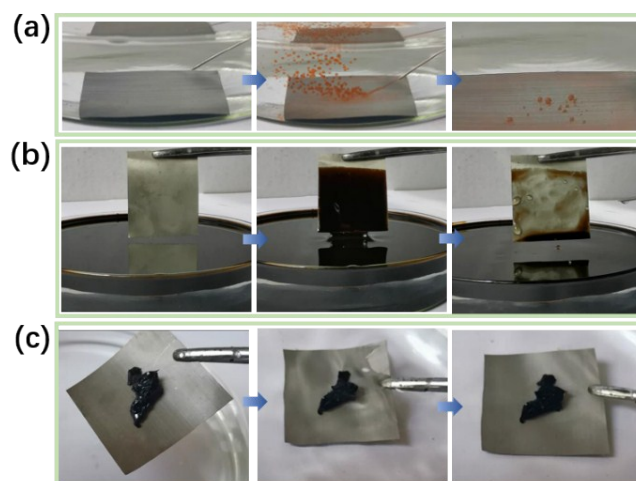

**Fig. S2.** (a) *n*-hexane, (b) light crude oil and (c) heavy crude oil to demonstrate the oil resistance performance of pristine SSM.

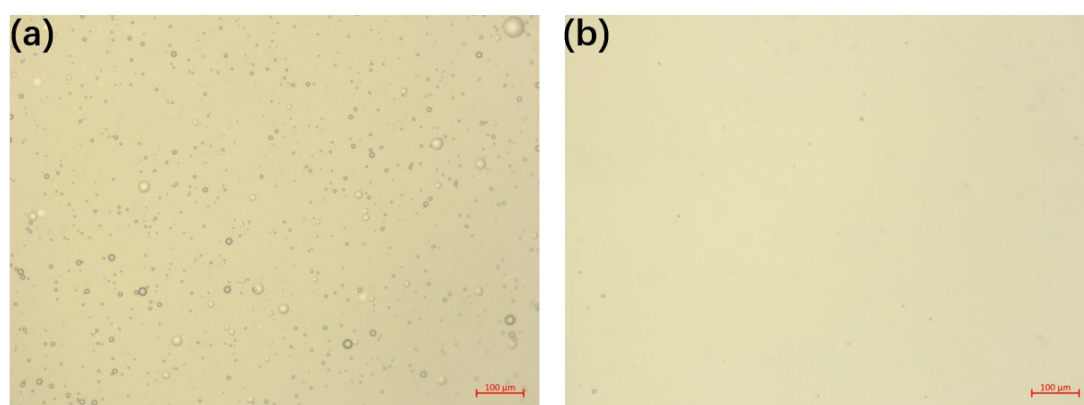

**Fig. S3.** Digital images of the diesel oil/water emulsion before and after separation.

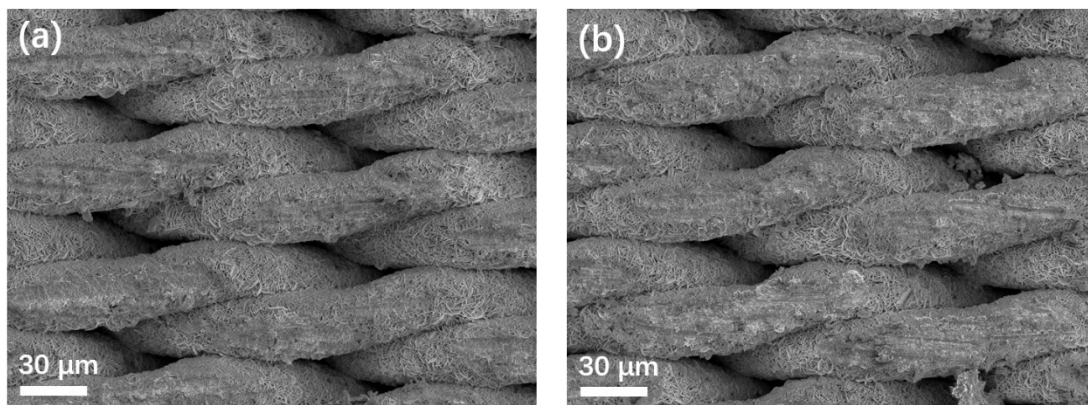

**Fig. S4.** SEM images of the mesh structure after sandpaper abrasion (a) abrasion 5 times; (b) abrasion 10 times.

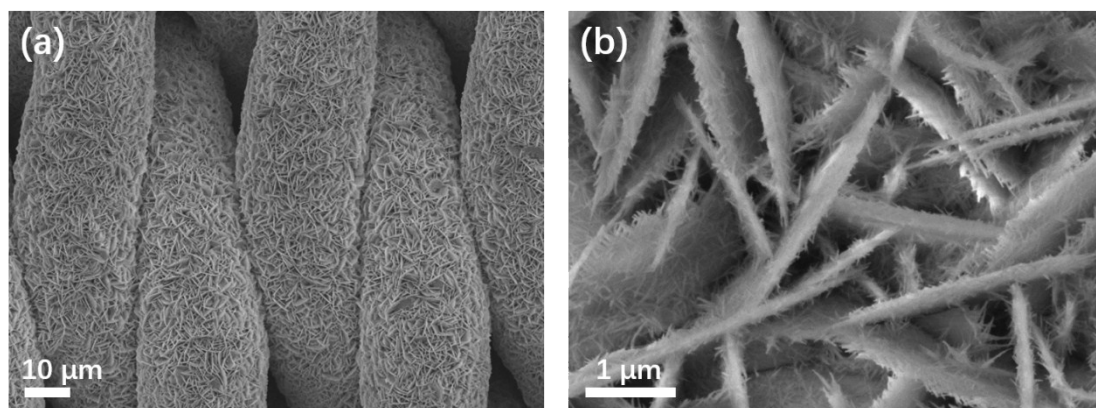

**Fig. S5.** Low-magnification and high-magnification of SSM soaking in aqueous solution with pH of 3 after 7 days.
